# Supplementary material for: Development of a polyacrylamide/chitosan composite hydrogel conduit containing synergistic cues of elasticity and topographies for promoting peripheral nerve regeneration
Source: Royal Society of Chemistry journal article supplement (doi:10.1039/d2bm00327a), 2022-01-01
Supplement: d2bm00327a1.pdf [file d2bm00327a1.pdf]

Supplementary data for

**Development of polyacrylamide/chitosan composite hydrogel conduit  
containing synergistic cues of elasticity and topographies for  
promoting peripheral nerve regeneration**

Fang Liu<sup>1,2,3#</sup>, Jiawei Xu<sup>1,2#</sup>, Anning Liu<sup>4</sup>, Linliang Wu<sup>1,2</sup>, Dongzhi Wang<sup>4,5</sup>, Qi Han<sup>1,2</sup>,

Tiantian Zheng<sup>1,2</sup>, Feiran Wang<sup>4</sup>, Yan Kong<sup>1,2</sup>, Guicai Li<sup>1,2\*</sup>, Peng Li<sup>4\*</sup>, Shouyong  
Gu<sup>6,7\*</sup>, Yumin Yang<sup>1,2,3\*</sup>

<sup>1</sup>Key laboratory of Neuroregeneration of Jiangsu and Ministry of Education, Co-  
innovation Center of Neuroregeneration, Nantong University, 226001, Nantong, P.R.  
China

<sup>2</sup>NMPA Key Laboratory for Research and Evaluation of Tissue Engineering  
Technology Products, Nantong University, 226001, Nantong, P.R. China

<sup>3</sup>School of Medical, Nantong University, 226001, Nantong, P.R. China

<sup>4</sup>Department of Gastrointestinal Surgery, Affiliated Hospital of Nantong University,  
Nantong, Jiangsu, China, 226001

<sup>5</sup>Department of General Surgery, Affiliated Hospital of Nantong University,  
Nantong, Jiangsu, China, 226001

<sup>6</sup>Research Center of Clinical Medicine, Affiliated Hospital of Nantong University,  
Nantong, Jiangsu, P.R China, 226001

<sup>7</sup>Geriatric Hospital affiliated to Nanjing Medical University, Nanjing , Jiangsu, P.R  
China, 211166

<sup>8</sup>Geriatric institute of jiangsu province, Jiangsu, P.R China, 211166

#These authors contributed equally to the work

**\*Corresponding author:**

[gcli1981@ntu.edu.cn](mailto:gcli1981@ntu.edu.cn)(Guicai Li), [pengli@ntu.edu.cn](mailto:pengli@ntu.edu.cn)(PengLi),  
[gushouyong@jspgh.com](mailto:gushouyong@jspgh.com) (Shouyong Gu), [yangym@ntu.edu.cn](mailto:yangym@ntu.edu.cn) (Yumin Yang)

**Table S1.** Ratio of PAM/CS hydrogel solution (solution volume: 100mL).

| Young's modulus(kPa) | Acrylamide (g) | N-H-methylene bisacrylamide(g) | Ammonium persulfate( $\mu$ L) | chitosan(g) |
|----------------------|----------------|--------------------------------|-------------------------------|-------------|
| 2.151                | 23.2           | 0.08                           | 200                           | 1           |
| 4.186                | 23.2           | 0.2                            | 200                           | 1           |
| 5.882                | 23.2           | 0.4                            | 200                           | 1           |
| 8.41                 | 23.2           | 0.6                            | 200                           | 1           |
| 10.024               | 23.2           | 0.8                            | 200                           | 1           |

**Table S2.** Variation of groove width of hydrogel with different elasticity after soaking.

| Groove size                               | 10( $\mu$ m) | 30( $\mu$ m) | 50( $\mu$ m) | 80( $\mu$ m) | Young's modulus |
|-------------------------------------------|--------------|--------------|--------------|--------------|-----------------|
| Groove dimensions before soaking          | 10 $\pm$ 0.5 | 30 $\pm$ 2   | 50 $\pm$ 2.5 | 80 $\pm$ 4.5 | 8.41kPa         |
| Groove size for soaking water for 15 days | 10 $\pm$ 2.5 | 35 $\pm$ 5   | 55 $\pm$ 8   | 100 $\pm$ 2  | 2.151kPa        |
|                                           | 10 $\pm$ 2.5 | 30 $\pm$ 4   | 55 $\pm$ 5   | 95 $\pm$ 3   | 4.186kPa        |
|                                           | 10 $\pm$ 2   | 30 $\pm$ 4   | 55 $\pm$ 5   | 95 $\pm$ 3   | 5.882kPa        |
|                                           | 10 $\pm$ 2   | 30 $\pm$ 3   | 55 $\pm$ 3   | 95 $\pm$ 2   | 8.41kPa         |
| □                                         | 10 $\pm$ 1.5 | 30 $\pm$ 3   | 50 $\pm$ 3   | 95 $\pm$ 2   | 10.024kPa       |

**Table S3.** The change of ridge width of hydrogel with different elasticity after soaking.

| Ridge size                             | 4.5( $\mu\text{m}$ ) | 10( $\mu\text{m}$ ) | 20( $\mu\text{m}$ ) | 65( $\mu\text{m}$ ) | Young's modulus |
|----------------------------------------|----------------------|---------------------|---------------------|---------------------|-----------------|
| Ridge dimensions before soaking        | 4.5 $\pm$ 1          | 10 $\pm$ 0.5        | 20 $\pm$ 1.5        | 65 $\pm$ 4.5        | 8.41kPa         |
| Ridge size soaked in water for 15 days | 5 $\pm$ 2            | 10 $\pm$ 5          | 20 $\pm$ 5          | 75 $\pm$ 4          | 2.151kPa        |
|                                        | 5 $\pm$ 2            | 10 $\pm$ 3          | 20 $\pm$ 4          | 75 $\pm$ 3          | 4.186kPa        |
|                                        | 5 $\pm$ 2            | 10 $\pm$ 3          | 20 $\pm$ 3          | 75 $\pm$ 3          | 5.882kPa        |
|                                        | 5 $\pm$ 1            | 10 $\pm$ 2          | 20 $\pm$ 3          | 75 $\pm$ 2          | 8.41kPa         |
| □                                      | 5 $\pm$ 1            | 10 $\pm$ 2          | 20 $\pm$ 3          | 75 $\pm$ 2          | 10.024kPa       |

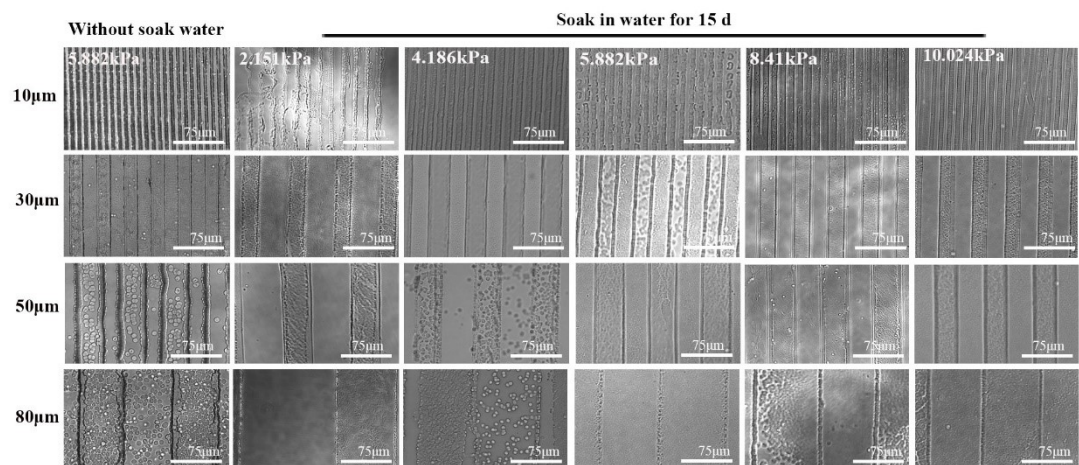

**Fig. S1.** Samples of different sizes were immersed in PBS for 15 d and then observed under a light microscope the erosion of the micro-pattern structure.

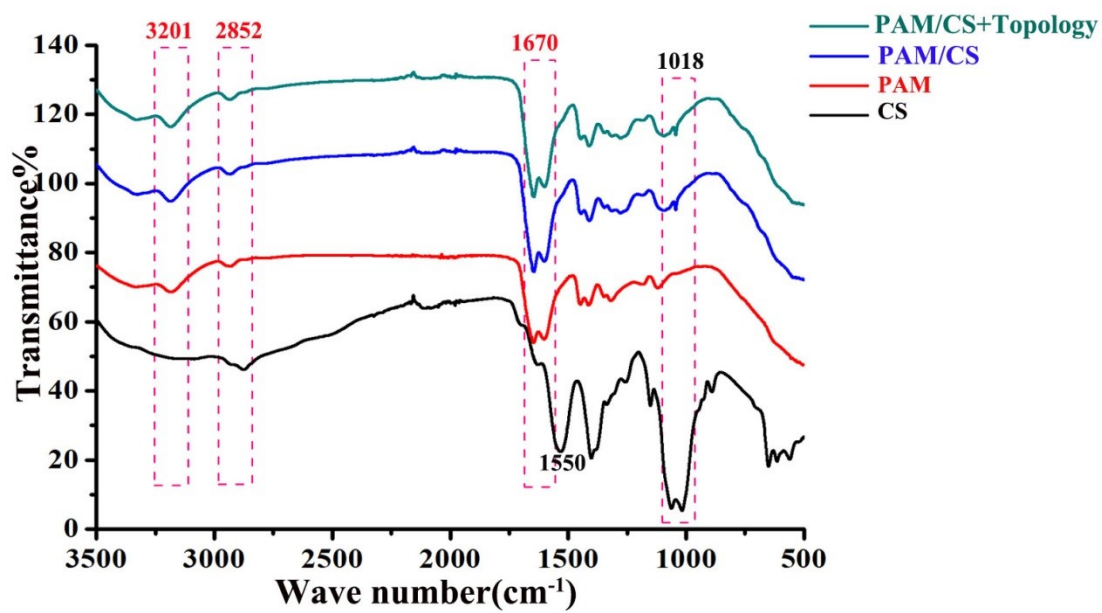

Fig. S2. ATR-FTIR spectra of chitosan, polyacrylamide, polyacrylamide/chitosan and polyacrylamide/chitosan with surface topology.

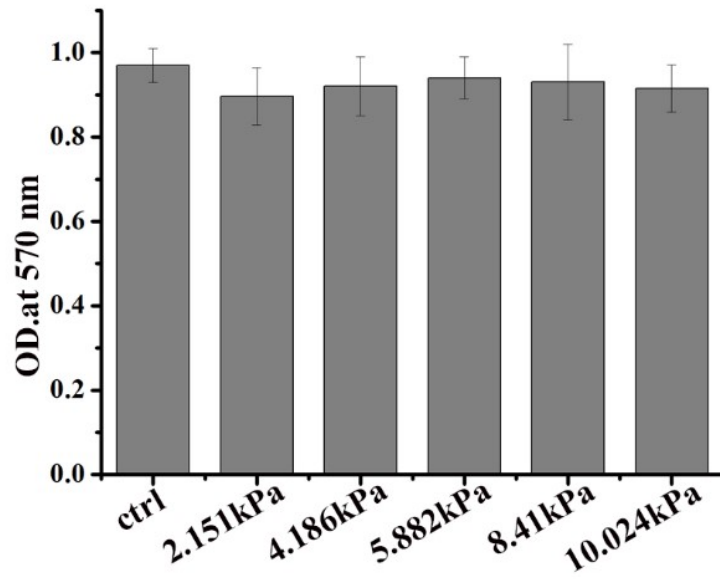

**Fig. S3.** In vitro cell cytocompatibility testing. The cytocompatibility of the hydrogel on L929 cells was detected by MTT at 48 h, n=4. All results are mean  $\pm$  SD.

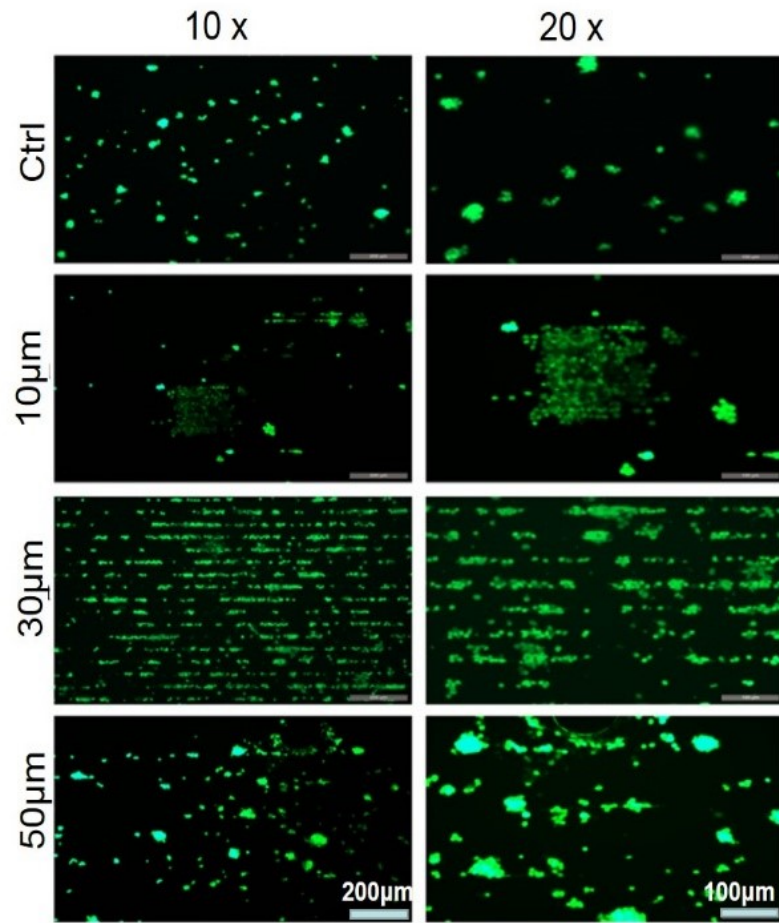

**Fig. S4.** Immunofluorescence staining of Schwann cells on hydrogel with elastic modulus of 5.882kPa and topological size of 10µm, 30 µm and 50µm, respectively after 1 day of culture.

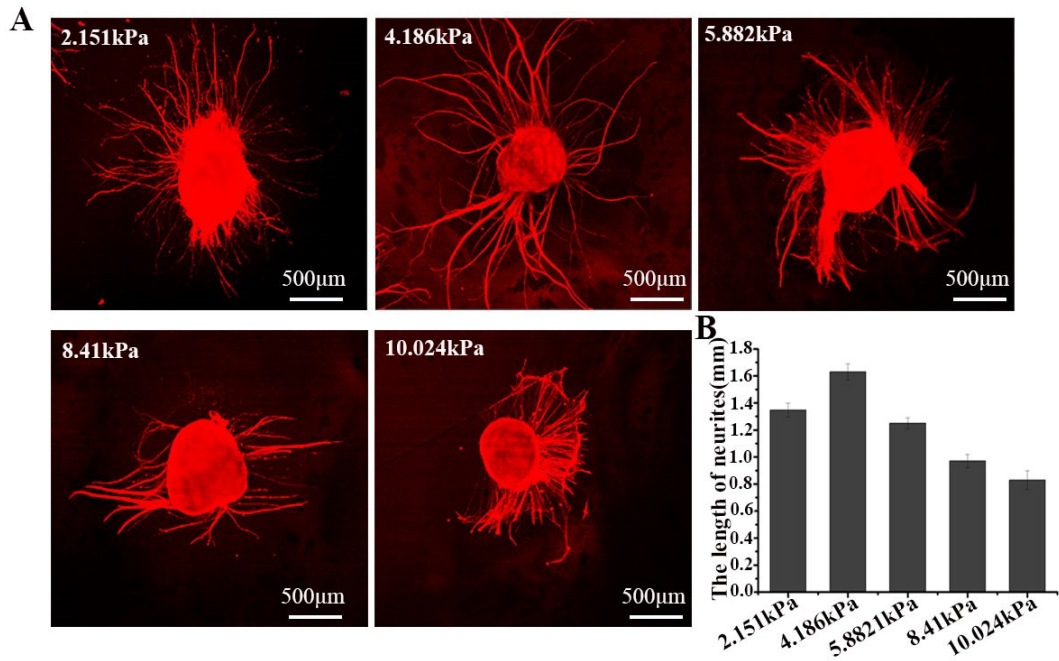

**Fig. S5.** Immunofluorescence staining of DRG neurons on hydrogels with different elastic modulus. (A) DRG neurons were cultured on different elastic hydrogels for 7 d. DRG neurons were stained with NF200 (red). Scale bar indicates 500  $\mu\text{m}$ . (B) Statistics of nerve protrusion length on different elastic hydrogels.



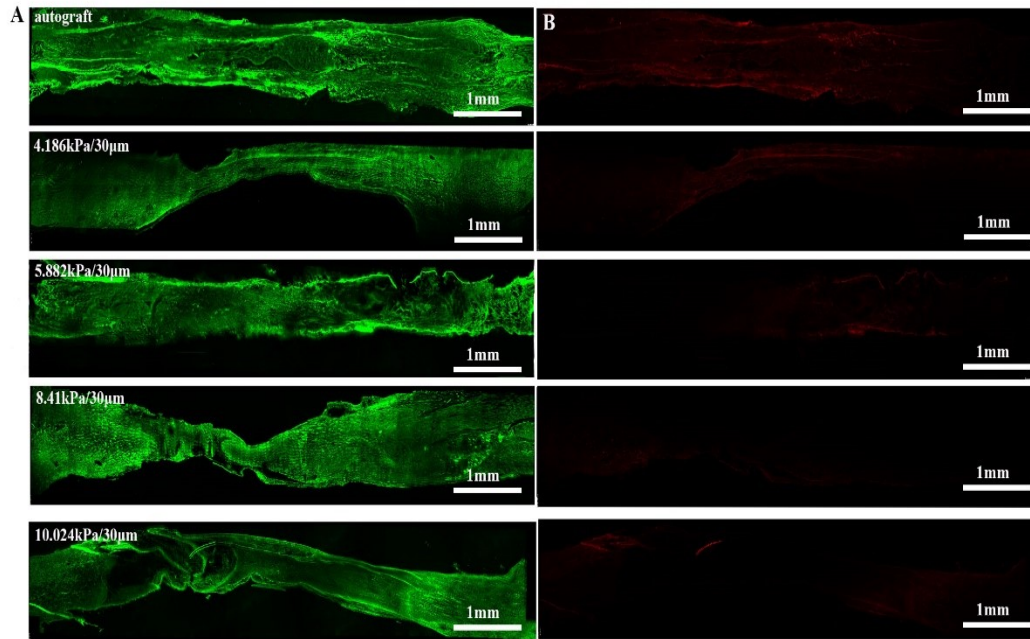

**Fig. S6.** Immunofluorescence staining of regenerated nerve tissue. At 2 w after surgery, representative images of nerve regeneration in the autograft group, 4.186 kPa/30 $\mu$ m, 5.882 kPa/30 $\mu$ m, 8.41 kPa/30 $\mu$ m and 10.024 kPa/30 $\mu$ m conduits. (A)Immunofluorescence staining image of longitudinal section of S100. Green color, S100. (B)Immunofluorescence staining image of longitudinal section of Neurofilaments. Red color, NF200. Scale bar indicates 1 mm.

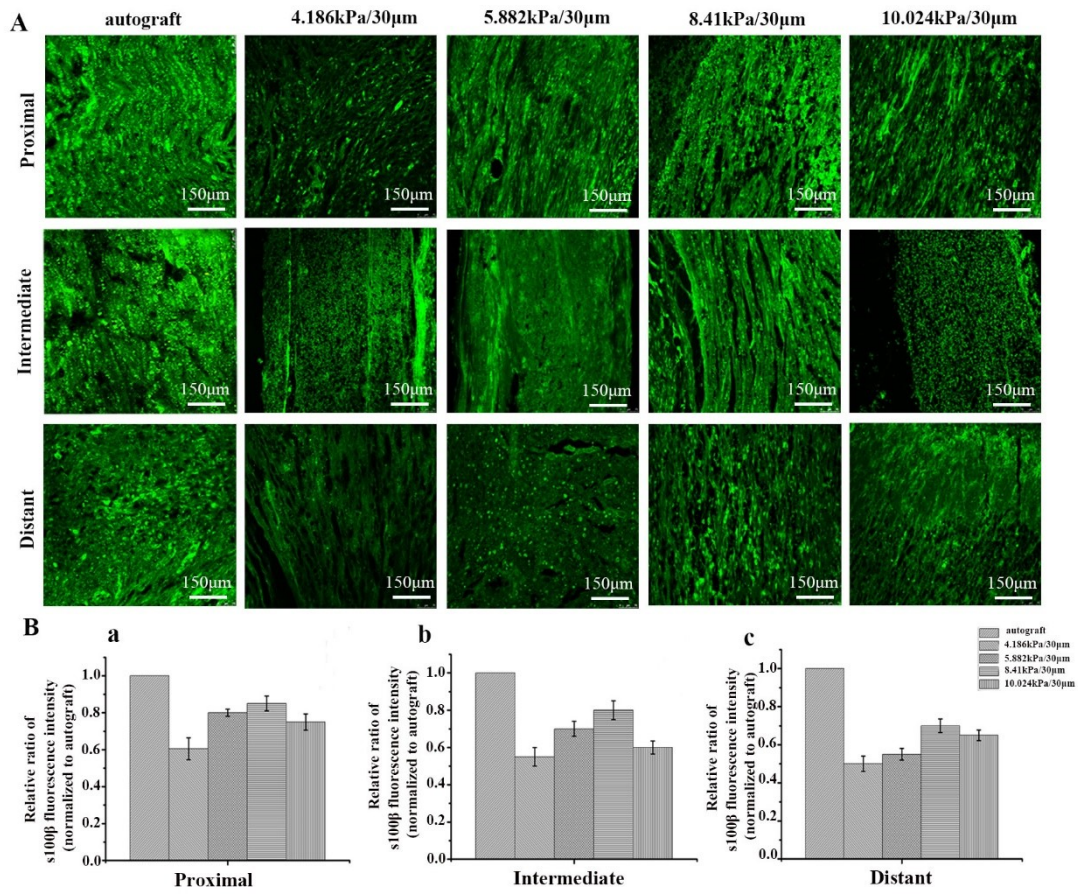

**Fig. S7.** The expression of the proximal, middle and distal nerves in the five groups regenerated nerves at 2 w postoperatively. (A)Immunofluorescence staining image of cross section of S100. Green color, S100. Scale bar indicates 150  $\mu$ m. (B)The relative expression level of S100. Scale bar indicates 150  $\mu$ m.

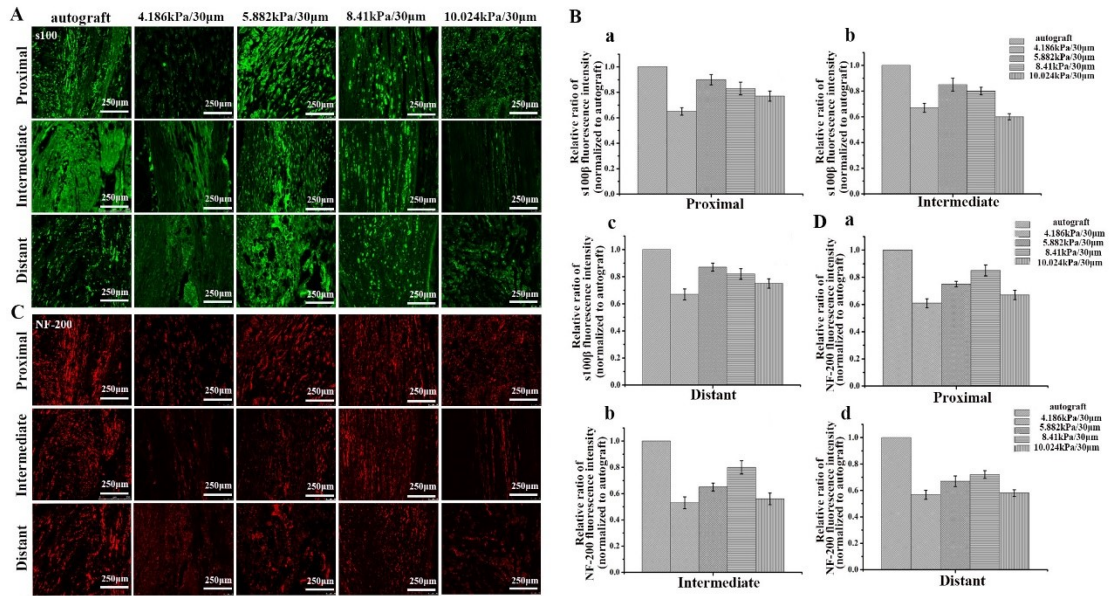

**Fig. S8.** The expression of the proximal, intermediate and distal nerves in the five groups regenerated nerves at 12 w postoperatively. (A)Immunofluorescence staining image of cross section of S100. Green color, S100. Scale bar = 250µm. (B)The relative expression level of S100. (C)Immunofluorescence staining image of cross-section of Neurofilaments. Red color, NF200. Scale bar= 250 µm. (D)The relative expression level of NF200. The result is the mean ± standard deviation.

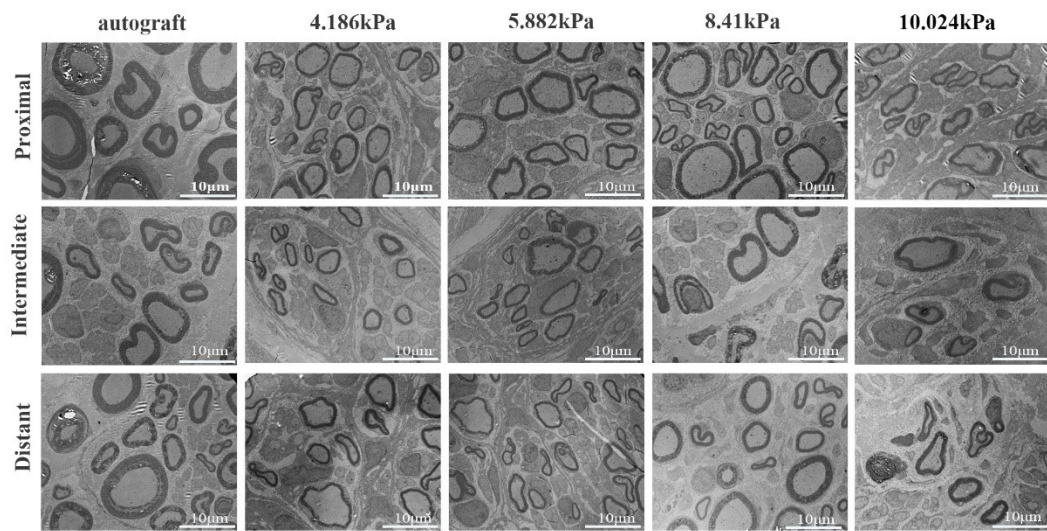

**Fig. S9.** The regeneration of the myelin sheath in the proximal, middle and distal cross-sections of the autograft group, 4.186 kPa/30  $\mu$ m, 5.882 kPa/30  $\mu$ m, 8.41 kPa/30  $\mu$ m and 10.024 kPa/30  $\mu$ m conduits regenerated sciatic nerve at 12 w postoperatively.

Scale bar indicates 10  $\mu$ m.
